# Supplementary material for: Viral Profiling Identifies Multiple Subtypes of Kaposi’s Sarcoma
Source: PubMed Central journal article supplement — mBio. 2014 Sep 23;5(5):e01633-14. doi: 10.1128/mBio.01633-14 (PMC4173763; doi:10.1128/mbio.01633-14), 2014-09-23
Supplement: mbo005141991sd1.pdf [file mbo005141991sd1.pdf]

**A Pilot Study of Kaposi Sarcoma-Associated Herpes virus (KSHV) Gene Expression in Patients With Newly Diagnosed Kaposi Sarcoma (KS) in Malawi**

Date: (day/month/year) \_\_\_/\_\_\_/\_\_\_\_\_ consent signed

**Eligibility Checklist**

| <b>Inclusion Criteria (All must be Yes)</b>                                                                                                                                                                         | <b>Yes</b> | <b>NO</b> |
|---------------------------------------------------------------------------------------------------------------------------------------------------------------------------------------------------------------------|------------|-----------|
| Age >=18 years                                                                                                                                                                                                      |            |           |
| Clinically Diagnosed KS of the skin, lymph node (palpable disease), or oral cavity with at least 5 measurable lesions and 2 of the lesion equal to 5mm x 5mm                                                        |            |           |
| HIV positive                                                                                                                                                                                                        |            |           |
| Ability and willingness to give informed consent                                                                                                                                                                    |            |           |
| Patients must, in the opinion of the Investigator, be capable of complying with the protocol                                                                                                                        |            |           |
| ART naive                                                                                                                                                                                                           |            |           |
| <b>Exclusion Criteria (All must be NO)</b>                                                                                                                                                                          | <b>Yes</b> | <b>NO</b> |
| Is the patient Pregnancy                                                                                                                                                                                            |            |           |
| Breastfeeding                                                                                                                                                                                                       |            |           |
| Concurrent neoplasia requiring cytotoxic therapy                                                                                                                                                                    |            |           |
| Anti-neoplastic treatment for KS (including chemotherapy, radiation therapy, local therapy, biological therapy, or investigational therapy) within 4 weeks (6 weeks for nitrosourea or mitomycin-C) of study entry. |            |           |
| Previous local therapy of any KS-indicator lesion within 60 days unless the lesion has clearly progressed since treatment.                                                                                          |            |           |
|                                                                                                                                                                                                                     |            |           |
| <b>Is the Patient Eligible for the study?</b>                                                                                                                                                                       |            |           |

**Study Form**

**Demographics**

1. Study Number: \_\_\_\_\_

2. Age: \_\_\_\_ Years

3. DOB (if known) (day/month/year) \_\_\_\_/\_\_\_\_/\_\_\_\_  Unknown birth date

4. Sex: M F

5. If female, is patient pregnant or breast feeding? Yes \_\_\_\_\_ No \_\_\_\_\_

**History**

6. When was the lesion/s first noticed by patient? months/years ago?

Months \_\_\_\_ Years \_\_\_\_

7. Is the patient being treated or has been treated for KS Yes \_\_\_\_\_ No \_\_\_\_\_

8. Is patient aware of their HIV status? Yes \_\_\_\_\_ No \_\_\_\_\_

9. If Yes, is patient on treatment for HIV? Yes \_\_\_\_\_ No \_\_\_\_\_

10. If Yes, type of treatment-----

11. How long has the patient been on this treatment? Months/years ago?

Months \_\_\_\_ Years \_\_\_\_

12A. WHO staging criteria

**WHO Staging criteria.** (Tick  all that apply)**Stage 1**

**Asymptomatic**

**Stage 2**

|                                    |  |
|------------------------------------|--|
| Loss of weight < 10%               |  |
| Minor mucocutaneous manifestations |  |
| Herpes zoster                      |  |
| Recurrent URTI                     |  |

**Stage 3**

|                                                 |  |
|-------------------------------------------------|--|
| In bed < 50% of normal daytime due to sickness  |  |
| Loss of weight > 10 %                           |  |
| Chronic diarrhea > 1 month                      |  |
| Constant or intermittent fever > 1 month        |  |
| Oral candidiasis                                |  |
| Vulvovaginal candidiasis > 1 month              |  |
| Pulmonary tuberculosis                          |  |
| Severe bacterial pneumonia                      |  |
| Other severe bacterial infections (Myositis...) |  |
| Oral hairy Leukoplakia                          |  |

**Stage 4**

|                                                |  |
|------------------------------------------------|--|
| In bed > 50% of normal daytime due to sickness |  |
| Wasting syndrome                               |  |
| Cryptococcosis extrapulmonary                  |  |
| Pneumocystis carinii pneumonia                 |  |
| Toxoplasmosis of the brain                     |  |
| Encephalopathy, dementia...                    |  |
| Candidiasis of the esophagus, trachea...       |  |
| Extrapulmonary tuberculosis                    |  |
| Herpes simplex mucocutaneous >1m or visceral   |  |
| Kaposi                                         |  |
| Cytomegalovirus other than liver lymph node    |  |

**WHO Clinical Stage:**

Stage 1     Stage 2     Stage 3     Stage 4

12B.

| Symptoms |                                 |    |     |
|----------|---------------------------------|----|-----|
| a        | Fever?                          | NO | YES |
| b        | Night Sweats                    | NO | YES |
| c        | Headache?                       | NO | YES |
| d        | Thrush?                         | NO | YES |
| e        | Abdominal pain?                 | NO | YES |
| f        | Vomiting?                       | NO | YES |
| g        | Diarrhea? (> 3 motions per day) | NO | YES |
| h        | Rash                            | NO | YES |
| i        | Pain or numbness in your legs?  | NO | YES |
| j        | Cough?                          | NO | YES |
| k        | Chest Pain                      | NO | YES |
| l        | Yellow eyes                     | NO | YES |
| m        | Vaginal Discharge               | NO | YES |
| n        | Genital Ulcers                  | NO | YES |
| o        | Oedema                          | NO | YES |
| p        | Weight loss                     | NO | YES |
| q        | Any other new symptoms?         | NO | YES |

13. Current Medications: -----  
-----

14. Drug Allergies:

Allergy to lidocaine or prilocaine: Yes\_\_\_\_\_ No\_\_\_\_\_

Other-----

**Physical Exam**

15. Vital signs

| Weight (kg) | Height (cm) | Temp ( C) | BP mmhg | Pulse | Resp | Karnovsky |
|-------------|-------------|-----------|---------|-------|------|-----------|
|             |             |           |         |       |      |           |

16. Number of cutaneous lesions (use code below) -----

1=0, 2= $\leq$ 10, 3= $>$ 10, $\leq$ 50 4> $>$ 50

If  $\leq$  10 lesions enter the number of lesions-----

17. Distribution of cutaneous KS. Answer each item.

| Site        | Presence<br>Yes (1) | Presence<br>No(0) |
|-------------|---------------------|-------------------|
| Head        |                     |                   |
| Oral cavity |                     |                   |
| Neck        |                     |                   |
| Chest       |                     |                   |
| Abdomen     |                     |                   |
| Back        |                     |                   |
| Right arm   |                     |                   |
| Left arm    |                     |                   |
| Right leg   |                     |                   |
| Left leg    |                     |                   |
| Right hand  |                     |                   |
| Left hand   |                     |                   |
| Right foot  |                     |                   |
| Left foot   |                     |                   |
| Genital     |                     |                   |

18 . Size of 5 largest skin lesion (If more than 5 lesions otherwise record all lesions)

cm----- Location\_\_\_\_\_

cm----- Location\_\_\_\_\_

cm----- Location\_\_\_\_\_

cm----- Location\_\_\_\_\_

cm----- Location\_\_\_\_\_

19. Location of the largest lesion-----

20. Is there lymph node involvement clinically? Yes\_\_\_\_\_ No\_\_\_\_\_

21. If yes, site involved-----

ACTG KS staging

|                                                                    | <b>(Any of the following) "0"</b>                                                                                                        | <b>(Any of the following) "1"</b>    |
|--------------------------------------------------------------------|------------------------------------------------------------------------------------------------------------------------------------------|--------------------------------------|
| Tumor (T)                                                          | Confined to skin and/or lymph nodes and/or minimal oral disease [Note: Minimal oral disease is non-nodular KS confined to the palate.]   | Tumor-associated edema or ulceration |
|                                                                    |                                                                                                                                          | Extensive oral KS                    |
|                                                                    |                                                                                                                                          | Gastrointestinal KS                  |
|                                                                    |                                                                                                                                          | KS in other non-nodal viscera        |
| Immune system (I)                                                  | CD4 cells $\geq$ 200/microL                                                                                                              | CD4 cells <200 per cubic millimeter  |
| Systemic illness (S)                                               | No history of OIs or thrush [Note: OIs are opportunistic infections.]                                                                    | History of OIs and/or thrush         |
|                                                                    | No "B" symptoms [Note: "B" symptoms are unexplained fever, night sweats, >10% involuntary weight loss, or diarrhea persisting >2 weeks.] | "B" symptoms present                 |
|                                                                    | Performance status $\geq$ 70 (Karnofsky)                                                                                                 | Performance status <70               |
| Other HIV-related illness (e.g., neurological disease or lymphoma) |                                                                                                                                          |                                      |

Record "0" or "1" according to presence of items in the appropriate column from above.

Resulting ACTG KS staging score: \_\_\_T\_\_\_\_\_I\_\_\_\_\_S\_\_\_\_\_

Laboratory Evaluation and Information

22. Blood collected into one 10 ml EDTA bottle collected. Yes \_\_\_\_\_

23. One punch biopsy collected. Yes \_\_\_\_\_

24. HIV status confirmed positive Yes \_\_\_\_\_

*Note: The following items will be entered when available from the lab*

25. CD4 count: \_\_\_\_\_

26. HIV viral load \_\_\_\_\_

27. KSHV viral load in PBMC \_\_\_\_\_

28. KSHV viral load in plasma \_\_\_\_\_

29. KSHV antibody levels \_\_\_\_\_

30. KSHV/HHV-8 Thymidine kinase (Orf24) gene expression in tissue \_\_\_\_\_

31. KSHV/HHV-8 Phosphorylase (orf36) gene expression in tissue \_\_\_\_\_
